# Supplementary material for: Putative long-range mossy fiber sprouting and regional hypermetabolic capacity in the hippocampus of patients with mesial temporal lobe epilepsy
Source: Research Square preprint supplement (doi:10.21203/rs.3.rs-6853877/v1), 2025-09-23
Supplement: Supplementary file 1 [file 07b562c018c9820f1267bf4c.xlsx]

## Sheet: Sheet1
Table 1: Demographic information of the resected hippocampi and postmortem control samples
Group	Case #	Age (year)	Sex	Clinical diagnosis or death cause	Post surgery or postmortem delay (hour)
Resected age=33.4±16.9 year; M/F=15/5	1	37	F	Drug-resistant MTLE, left hippocampal sclerosis	0.5
	2	27	F	Drug-resistant MTLE, left hippocampal sclerosis	0.5
	3	13	M	Drug-resistant MTLE, left hippocampal sclerosis	0.5
	4	45	M	Drug-resistant MTLE, left hippocampal sclerosis	0.5
	5	33	M	Drug-resistant MTLE, left hippocampal sclerosis	0.5
	6	52	F	Drug-resistant MTLE, left hippocampal sclerosis	0.5
	7	43	M	Drug-resistant MTLE, left hippocampal sclerosis	0.5
	8	36	M	Drug-resistant MTLE, right hippocampal sclerosis	0.5
	9	25	M	Drug-resistant MTLE, right hippocampal sclerosis	0.5
	10	24	M	Drug-resistant MTLE, left hippocampal sclerosis	0.5
	11	23	F	Drug-resistant epilepsy, complex partial seizure	0.5
	12	53	M	Focal epilepsy, right hippocampal sclerosis	0.5
	13	31	F	Drug-resistant epilepsy, complex partial seizure	0.5
	14	15	M	Drug-resistant epilepsy, complex partial seizure	0.5
	15	18	M	Drug-resistant MTLE, left hippocampal sclerosis	0.5
	16	19	M	Drug-resistant MTLE, right hippocampal sclerosis	0.5
	17	8	M	Drug-resistant MTLE, left hippocampal sclerosis	0.5
	18	32	M	Drug-resistant MTLE, right hippocampal sclerosis	0.5
	19	73	M	Epilepsy, multiple right temporal lobe access	0.5
	20	60	M	Epilepsy, right temporal lobe astrocytoma	0.5
Control age=36.0±17.9year; MF/=13/7	1	8	M	Leukemia	3
	2	14	M	Leukemia	9
	3	16	F	Leukemia	6
	4	18	M	Gliaoma	9
	5	21	M	Leukemia	5
	6	22	F	Systemic lupus erythematosus	12
	7	24	M	Leukemia	8
	8	28	M	Lung cancer	2
	9	29	F	Gastric carcinoma	6
	10	31	F	Leukemia	11
	11	33	F	Colon cancer	6
	12	38	M	Liver cancer	8
	13	46	F	Ovarian cancer	12
	14	47	M	Lung cancer	7
	15	49	M	Lung cancer	10
	16	51	M	Lymphoma	9
	17	54	M	Intracranial hemorrhagic stroke	6
	18	55	M	Asthma attack	9
	19	65	M	Esophageal cancer	3
	20	70	F	Diabetic heart failure	7
