# Supplementary material for: Putative long-range mossy fiber sprouting and regional hypermetabolic capacity in the hippocampus of patients with mesial temporal lobe epilepsy
Source: Research Square preprint supplement (doi:10.21203/rs.3.rs-6853877/v1), 2025-09-23
Supplement: Supplementary file 2 [file f5c782f6c18992210e77c29d.xlsx]

## Sheet: Sheet1
Table 2：Key immunolabeling resources used in the present study
Reagent	Source	Identifier
Rabbit polyclonal anti-αSMA	Sigma-Aldrich	Cat# ABT1487;RRID:AB_3094617
Rabbit monoclonal anti-BACE1	Abcam	Cat# ab183612; RRID: AB_3094757
Goat polyclonal anti-Sortilin	R&D Systems	Cat# AF3154; RRID:AB_2286389
Mouse monoclonal anti-NeuN	Sigma-Aldrich	Cat# MAB377; RRID:AB_2298772
Rabbit polyclonal anti-ZnT3	Proteintech	Cat# 17363-1-AP; RRID:AB_2239335
Mouse monoclonal anti-NPY	Santa Cruz Biotechnology	Cat# sc-133080; RRID:AB_2298657
Biotinylated horse anti-mouse/rabbit/goat IgG antibody (H+L)	Vector Laboratories	Cat# BA-1300; RRID:AB_2336188
Vectastain Elite ABC kit	Vector Laboratories	Cat# PK-6100
